# Supplementary material for: Regenerative Capacity of Old Muscle Stem Cells Declines without Significant Accumulation of DNA Damage
Source: PubMed Central journal article supplement (PMC3660529; doi:10.1371/journal.pone.0063528), 2013-05-21
Supplement: pone.0063528.s006.pdf [file pone.0063528.s006.pdf]

**Table S1**

|                                   | <b>Old vs young</b> |               |                    |                |
|-----------------------------------|---------------------|---------------|--------------------|----------------|
|                                   | <b>Symbol</b>       | <b>Refseq</b> | <b>Fold Change</b> | <b>p-value</b> |
| <b>Apoptosis</b>                  | Atm                 | NM_007499     | 1.14               | 0.2595         |
|                                   | Brca1               | NM_009764     | 1.21               | 0.2001         |
|                                   | Mbd4                | NM_010774     | 1.17               | 0.0576         |
|                                   | Mgmt                | NM_008598     | 1.03               | 0.4526         |
|                                   | Mlh1                | NM_026810     | 1.11               | 0.0717         |
|                                   | Prkdc               | NM_011159     | 1.18               | 0.1651         |
|                                   | Rad21               | NM_009009     | 0.92               | 0.1796         |
|                                   | Trp53               | NM_011640     | 0.99               | 0.7870         |
| <b>Cell Cycle Arrest</b>          | Chek1               | NM_007691     | 1.04               | 0.4769         |
|                                   | Gadd45a             | NM_007836     | 0.85               | 0.0673         |
|                                   | Hus1                | NM_008316     | 1.04               | 0.4726         |
|                                   | Msh2                | NM_008628     | 1.03               | 0.2917         |
| <b>Cell Cycle Checkpoint</b>      | Brca2               | NM_009765     | 1.10               | 0.3299         |
|                                   | Pinx1               | NM_028228     | 1.04               | 0.5702         |
|                                   | Rad1                | NM_011232     | 1.00               | 0.9954         |
|                                   | Rad9                | NM_011237     | 1.04               | 0.7445         |
|                                   | Smc1a               | NM_019710     | 1.09               | 0.1296         |
| <b>Cell Cycle Related</b>         | Atm                 | NM_007499     | 1.14               | 0.2595         |
|                                   | Chaf1a              | NM_013733     | 1.03               | 0.8364         |
|                                   | Rad21               | NM_009009     | 0.92               | 0.1796         |
|                                   | Rbbp4               | NM_009030     | 0.94               | 0.4231         |
|                                   | Smc3                | NM_007790     | 0.99               | 0.8595         |
|                                   | Terf1               | NM_009352     | 1.09               | 0.3338         |
|                                   | Tlk1                | NM_172664     | 1.04               | 0.4788         |
| <b>Double-Strand Break repair</b> | Brca1               | NM_009764     | 1.21               | 0.2001         |
|                                   | Brca2               | NM_009765     | 1.10               | 0.3299         |
|                                   | Dmc1                | NM_010059     | 1.20               | 0.5257         |
|                                   | Fen1                | NM_007999     | 1.07               | 0.3573         |
|                                   | H2afx               | NM_010436     | 0.97               | 0.6551         |
|                                   | Lig4                | NM_176953     | 0.86               | 0.0768         |
|                                   | Mre11a              | NM_018736     | 1.08               | 0.3193         |
|                                   | Prkdc               | NM_011159     | 1.18               | 0.1651         |
|                                   | Rad21               | NM_009009     | 0.92               | 0.1796         |
|                                   | Rad50               | NM_009012     | 1.11               | 0.0594         |
|                                   | Rad51               | NM_011234     | 1.08               | 0.3403         |
|                                   | Rad51c              | NM_053269     | 1.00               | 0.9577         |
|                                   | Rad51l1             | NM_009014     | 1.16               | 0.1862         |
|                                   | Rad51l3             | NM_011235     | 1.08               | 0.4290         |

|                                   |           |              |        |        |
|-----------------------------------|-----------|--------------|--------|--------|
|                                   | Rad52     | NM_011236    | 1.15   | 0.0933 |
|                                   | Rad54l    | NM_009015    | 0.88   | 0.2520 |
|                                   | Xrcc2     | NM_020570    | 1.09   | 0.1849 |
|                                   | Xrcc3     | NM_028875    | 1.03   | 0.7082 |
|                                   | Xrcc4     | NM_028012    | 0.98   | 0.8000 |
|                                   | Xrcc5     | NM_009533    | 0.88   | 0.1674 |
|                                   | Xrcc6     | NM_010247    | 1.01   | 0.7755 |
| <b>Damaged DNA Binding</b>        | Brca1     | NM_009764    | 1.21   | 0.2001 |
|                                   | Ercc1     | NM_007948    | 0.96   | 0.5727 |
|                                   | H2afx     | NM_010436    | 0.97   | 0.6551 |
|                                   | Msh2      | NM_008628    | 1.03   | 0.2917 |
|                                   | Msh3      | NM_010829    | 1.06   | 0.2798 |
|                                   | Rad1      | NM_011232    | 1.00   | 0.9954 |
|                                   | Rad51     | NM_011234    | 1.08   | 0.3403 |
|                                   | Rad51c    | NM_053269    | 1.00   | 0.9577 |
|                                   | Rad51l1   | NM_009014    | 1.16   | 0.1862 |
|                                   | Trpc2     | NM_011644    | 1.24   | 0.1598 |
|                                   | Xpa       | NM_011728    | 1.10   | 0.1260 |
|                                   | Xpc       | NM_009531    | 0.96   | 0.7057 |
|                                   | Xrcc1     | NM_009532    | 0.89   | 0.0354 |
|                                   | Xrcc2     | NM_020570    | 1.09   | 0.1849 |
|                                   | Xrcc3     | NM_028875    | 1.03   | 0.7082 |
| <b>Base Excision Repair</b>       | Apex1     | NM_009687    | 1.05   | 0.5033 |
|                                   | Apex2     | NM_029943    | 1.13   | 0.0219 |
|                                   | Ccno      | NM_001081062 | 1.37   | 0.1940 |
|                                   | Lig3      | NM_010716    | 1.03   | 0.6610 |
|                                   | Mbd4      | NM_010774    | 1.17   | 0.0576 |
|                                   | Mpg       | NM_010822    | 1.02   | 0.5221 |
|                                   | Mutyh     | NM_133250    | 1.08   | 0.2340 |
|                                   | Neil1     | NM_028347    | 0.96   | 0.5825 |
|                                   | Neil2     | NM_201610    | 1.14   | 0.6499 |
|                                   | Neil3     | NM_146208    | 0.86   | 0.1348 |
|                                   | Nthl1     | NM_008743    | 1.04   | 0.7094 |
|                                   | Ogg1      | NM_010957    | 1.04   | 0.6372 |
|                                   | Parp1     | NM_007415    | 0.99   | 0.7098 |
|                                   | Parp2     | NM_009632    | 1.14   | 0.1927 |
|                                   | Parp3     | NM_145619    | 1.28   | 0.3461 |
|                                   | Polb      | NM_011130    | 0.86   | 0.0306 |
|                                   | Smug1     | NM_027885    | 0.95   | 0.4557 |
|                                   | Tdg       | NM_011561    | 0.95   | 0.5535 |
|                                   | Ung       | NM_011677    | 1.06   | 0.4679 |
| Xrcc1                             | NM_009532 | 0.89         | 0.0354 |        |
| <b>Nucleotide-excision Repair</b> | Atxn3     | NM_029705    | 0.95   | 0.3230 |

|                           |         |              |      |        |
|---------------------------|---------|--------------|------|--------|
|                           | Brip1   | NM_178309    | 1.03 | 0.6550 |
|                           | Ccnh    | NM_023243    | 0.98 | 0.7194 |
|                           | Cdk7    | NM_009874    | 0.80 | 0.1612 |
|                           | Dclre1a | NM_018831    | 1.23 | 0.1280 |
|                           | Ddb1    | NM_015735    | 0.85 | 0.0348 |
|                           | Ddb2    | NM_028119    | 1.13 | 0.2722 |
|                           | Ercc1   | NM_007948    | 0.96 | 0.5727 |
|                           | Ercc2   | NM_007949    | 1.04 | 0.5775 |
|                           | Ercc3   | NM_133658    | 0.89 | 0.2093 |
|                           | Ercc4   | NM_015769    | 1.11 | 0.1298 |
|                           | Ercc5   | NM_011729    | 0.90 | 0.1929 |
|                           | Ercc6   | NM_001081221 | 0.72 | 0.2485 |
|                           | Ercc8   | NM_028042    | 0.92 | 0.6078 |
|                           | Fancc   | NM_007985    | 1.10 | 0.2320 |
|                           | Lig1    | NM_010715    | 1.02 | 0.4081 |
|                           | Mms19   | NM_028152    | 0.97 | 0.6422 |
|                           | Nthl1   | NM_008743    | 1.04 | 0.7094 |
|                           | Pnkp    | NM_021549    | 0.91 | 0.1243 |
|                           | Poll    | NM_020032    | 0.92 | 0.2330 |
|                           | Rad23a  | NM_009010    | 1.03 | 0.6359 |
|                           | Rad23b  | NM_009011    | 1.15 | 0.2510 |
|                           | Rpa1    | NM_026653    | 1.05 | 0.4996 |
|                           | Rpa3    | NM_026632    | 0.93 | 0.2431 |
|                           | Slk     | NM_009289    | 1.08 | 0.0424 |
|                           | Xab2    | NM_026156    | 1.01 | 0.8596 |
|                           | Xpa     | NM_011728    | 1.10 | 0.1260 |
|                           | Xpc     | NM_009531    | 0.96 | 0.7057 |
| <b>Mismatch Repair</b>    | Mlh1    | NM_026810    | 1.11 | 0.0717 |
|                           | Mlh3    | NM_175337    | 1.15 | 0.0109 |
|                           | Msh2    | NM_008628    | 1.03 | 0.2917 |
|                           | Msh3    | NM_010829    | 1.06 | 0.2798 |
|                           | Msh4    | NM_031870    | 1.50 | 0.2275 |
|                           | Msh5    | NM_013600    | 0.91 | 0.2441 |
|                           | Msh6    | NM_010830    | 0.90 | 0.1180 |
|                           | Pms1    | NM_153556    | 1.08 | 0.1300 |
|                           | Pms2    | NM_008886    | 1.21 | 0.0202 |
|                           | Pold3   | NM_133692    | 1.14 | 0.0164 |
|                           | Trex1   | NM_011637    | 1.42 | 0.0236 |
| <b>DNA repair Related</b> | Atm     | NM_007499    | 1.14 | 0.2595 |
|                           | Atr     | NM_019864    | 0.85 | 0.3628 |
|                           | Atrx    | NM_009530    | 1.13 | 0.3379 |
|                           | Chaf1a  | NM_013733    | 1.03 | 0.8364 |
|                           | Cry2    | NM_009963    | 1.09 | 0.2835 |

|          |           |      |        |
|----------|-----------|------|--------|
| Exo1     | NM_012012 | 0.58 | 0.3763 |
| Fancg    | NM_053081 | 1.00 | 0.9358 |
| Fen1     | NM_007999 | 1.07 | 0.3573 |
| Gtf2h1   | NM_008186 | 1.09 | 0.1117 |
| Gtf2h2   | NM_022011 | 1.06 | 0.3269 |
| Lig1     | NM_010715 | 1.02 | 0.4081 |
| Mgmt     | NM_008598 | 1.03 | 0.4526 |
| Mif      | NM_010798 | 1.03 | 0.6745 |
| Pold1    | NM_011131 | 1.10 | 0.3742 |
| Pole     | NM_011132 | 1.04 | 0.5916 |
| Polh     | NM_030715 | 1.01 | 0.5991 |
| Poli     | NM_011972 | 1.06 | 0.5399 |
| Polk     | NM_012048 | 1.15 | 0.1116 |
| Pttg1    | NM_013917 | 1.64 | 0.0109 |
| Rad18    | NM_021385 | 1.06 | 0.3365 |
| Rad21    | NM_009009 | 0.92 | 0.1796 |
| Rad50    | NM_009012 | 1.11 | 0.0594 |
| Rad9     | NM_011237 | 1.04 | 0.7445 |
| Rad9b    | NM_144912 | 1.21 | 0.1261 |
| Rbbp4    | NM_009030 | 0.94 | 0.4231 |
| Rbm4     | NM_009032 | 0.94 | 0.1597 |
| Rev1     | NM_019570 | 1.11 | 0.3661 |
| Rfc1     | NM_011258 | 0.98 | 0.7513 |
| Smc1a    | NM_019710 | 1.09 | 0.1296 |
| Smc3     | NM_007790 | 0.99 | 0.8595 |
| Srd5a2   | NM_053188 | 0.90 | 0.4235 |
| Sumo1    | NM_009460 | 1.07 | 0.1292 |
| Tdg      | NM_011561 | 0.95 | 0.5535 |
| Top3a    | NM_009410 | 2.35 | 0.3662 |
| Top3b    | NM_011624 | 0.92 | 0.2535 |
| Ube2a    | NM_019668 | 1.08 | 0.3856 |
| Ung      | NM_011677 | 1.06 | 0.4679 |
| Wrn      | NM_011721 | 1.15 | 0.0140 |
| Wrnip1   | NM_030215 | 1.03 | 0.7933 |
| Xrcc6bp1 | NM_026858 | 0.86 | 0.3459 |
| Xrn2     | NM_011917 | 1.04 | 0.5769 |
